# Supplementary material for: Multi-Scale Digital Pathology Patch Level Prostate Cancer Grading Using Deep Learning: Use Case Evaluation of DiagSet Dataset
Source: Preprints.org preprint supplement (doi:10.20944/preprints202405.0455.v1), 2024-05-08
Supplement: Supplementary file 1 [file supplementary]

Supplementary Materials

Multi-Scale Digital Pathology Patch Level Prostate Cancer Grading Using Deep Learning: Use Case Evaluation of DiagSet Dataset

Tanaya Kondejkar 1, Salah Mohammed Awad Al-Heejawi 2, Anne Breggia 3, Bilal Ahmad 4, Robert Christman 5, Ryan Stephen T 6 and Saeed Amal 7,*

1 Northeastern University, College of Engineering, United States; kondejkar.t@northeastern.edu

2 Northeastern University, College of Engineering, United States; s.al-heejawi@northeastern.edu

3 Maine Health Institute for Research, United States; anne.breggia@mainehealth.org

4 Maine Medical Center, United States; bilal.ahmad@spectrumhcp.com

5 Maine Medical Center, United States; robert.christman@spectrumhcp.com

6 Maine Medical Center, United States; stephen.ryan@mainehealth.org

7 The Roux Institute, Department of Bioengineering, College of Engineering at Northeastern University, United States; s.amal@northeastern.edu

***** Correspondence: Saeed Amal email: s.amal@northeastern.edu

**Resnet34 on all magnifications:**


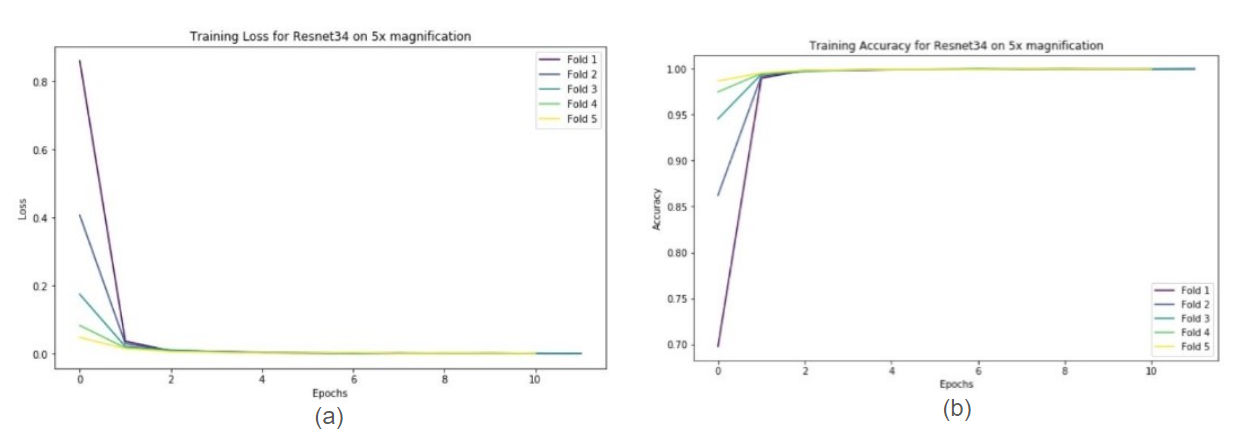


**Figure S1.** Training Loss (**a**) and Training Accuracy (**b**) for Resnet34 on 5× magnification.
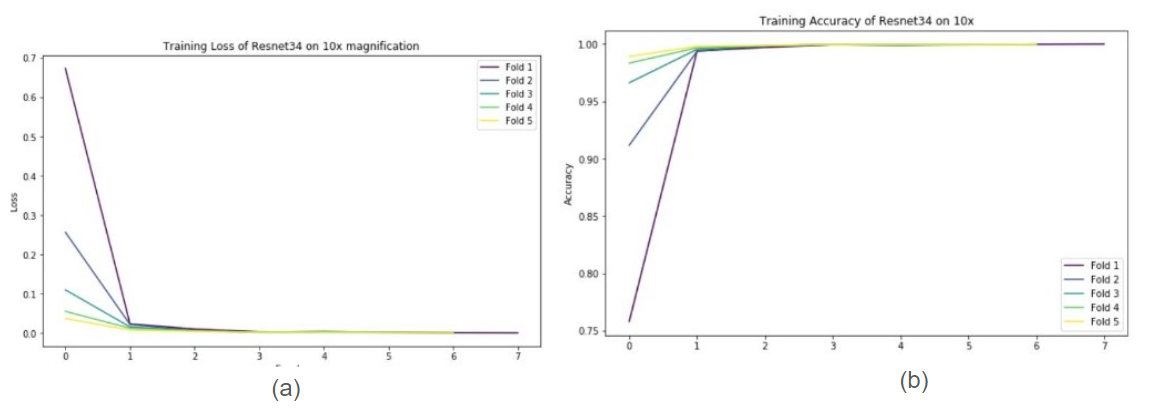


**Figure S2.** Training Loss (**a**) and Training Accuracy (**b**) for Resnet34 on 10× magnification.


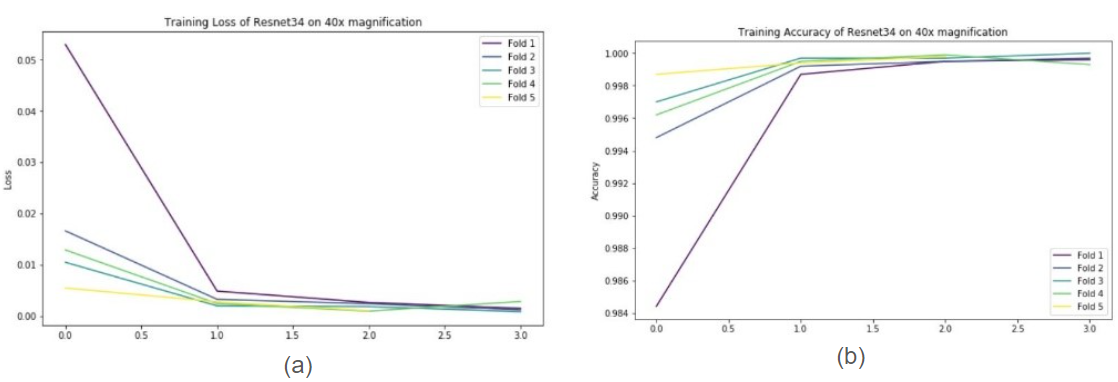


**Figure S3.** Training Loss (**a**) and Training Accuracy (**b**) for Resnet34 on 40× magnification.

**Resnet18 on all magnifications:**


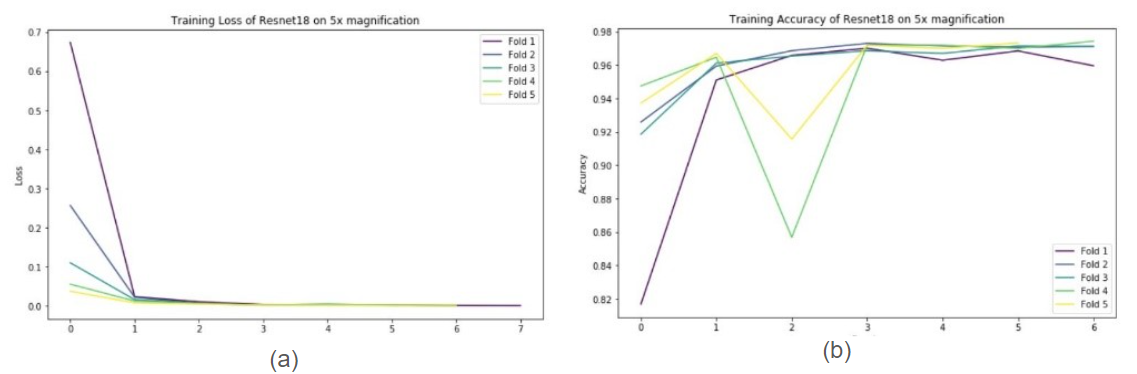


**Figure S4.** Training Loss (**a**) and Training Accuracy (**b**) for Resnet18 on 5× magnification.


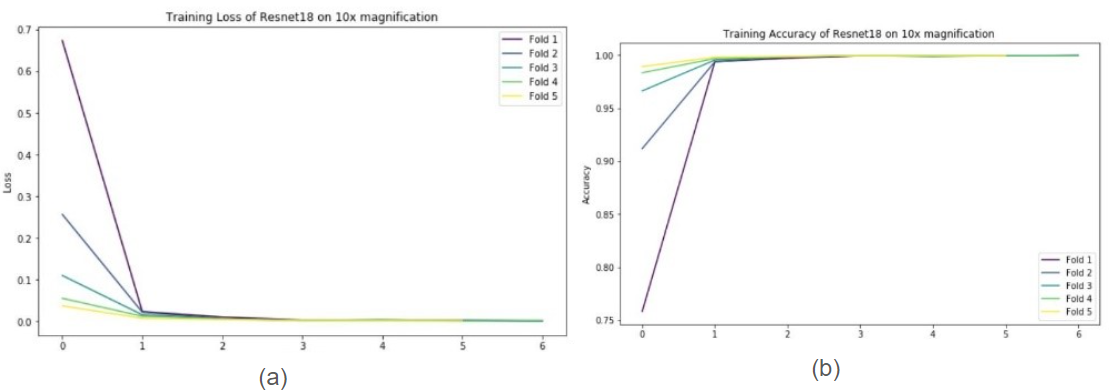


**Figure S5.** Training Loss (**a**) and Training Accuracy (**b**) for Resnet18 on 10× magnification.


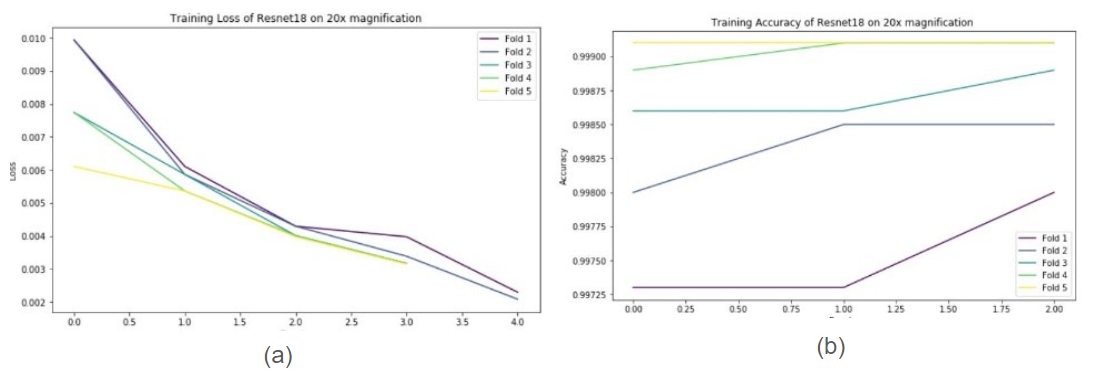


**Figure S6.** Training Loss (**a**) and Training Accuracy (**b**) for Resnet18 on 20× magnification.


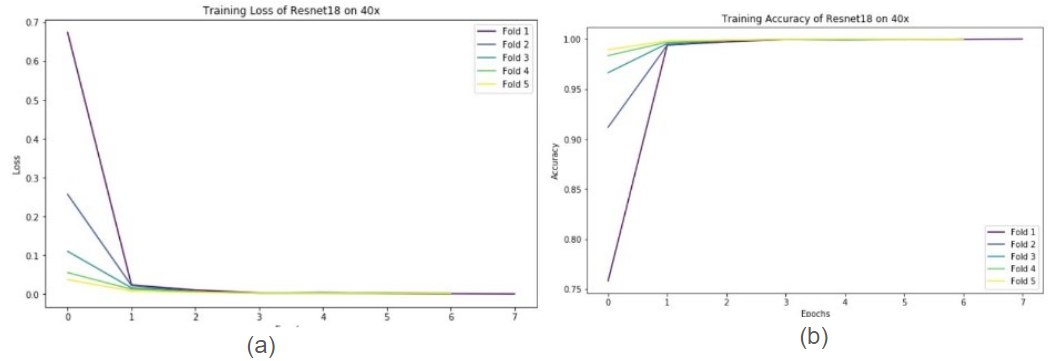


**Figure S7.** Training Loss (**a**) and Training Accuracy (**b**) for Resnet18 on 40× magnificatin.

**Resnet50 Training Loss and Accuracy across all magnifications:**


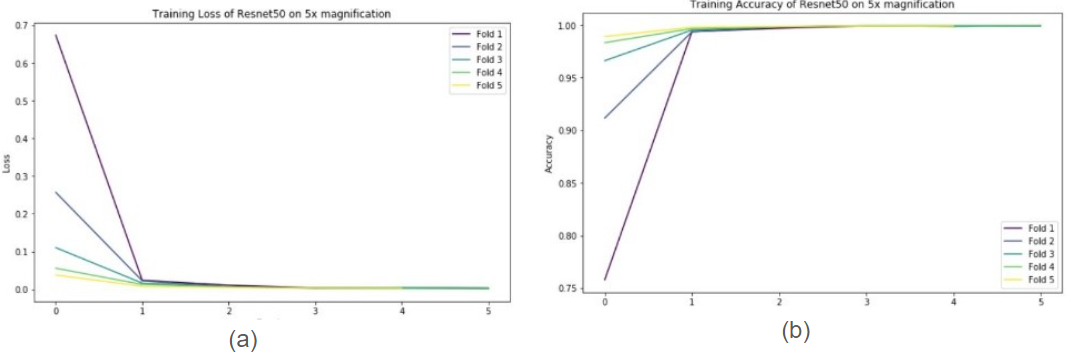


**Figure S8.** Training Loss (**a**) and Training Accuracy (**b**) for Resnet50 on 5× magnification.


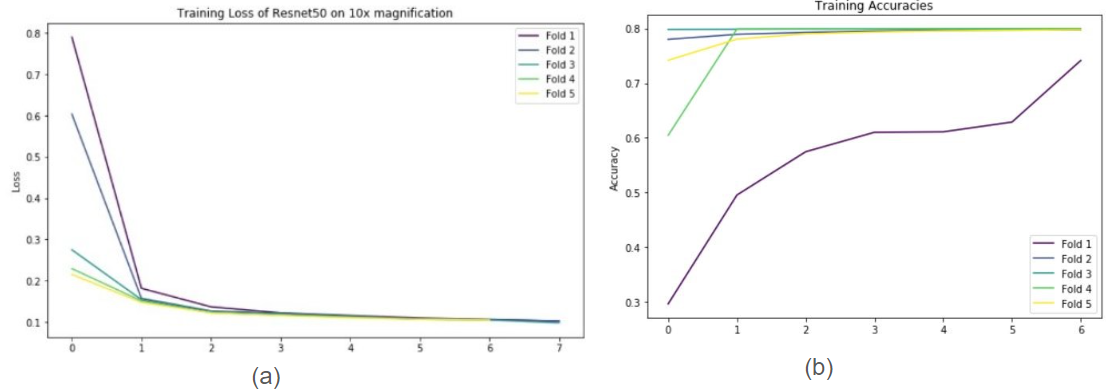


**Figure S9.** Training Loss (**a**) and Training Accuracy (**b**) for Resnet50 on 10× magnification.


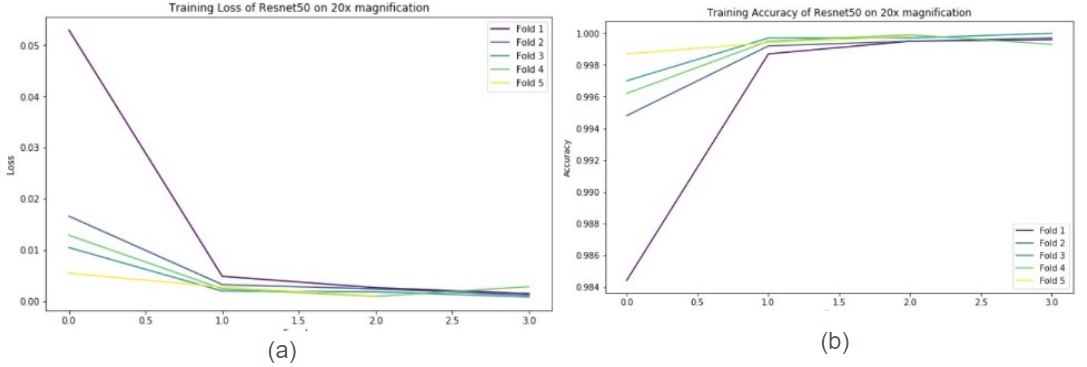


**Figure S10.** Training Loss (**a**) and Training Accuracy (**b**) for Resnet50 on 20× magnification.


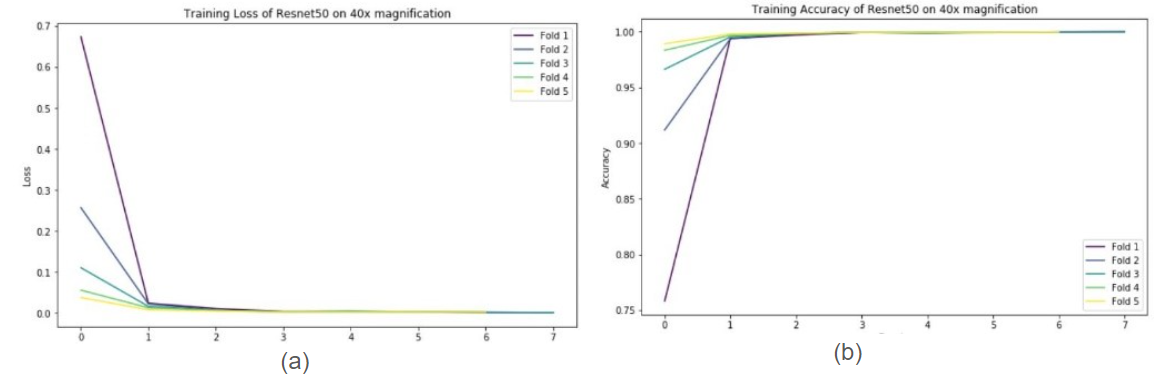


**Figure S11.** Training Loss (**a**) and Training Accuracy (**b**) for Resnet50 on 40× magnification.
